# Supplementary material for: Rad52 Oligomeric N-Terminal Domain Stabilizes Rad51 Nucleoprotein Filaments and Contributes to Their Protection against Srs2
Source: MDPI journal article supplement (doi:10.3390/cells10061467), 2021-06-11
Supplement: s1 [file s1]

**Table S1. *S. cerevisiae* strains.**

| Strain   | Genotype                                                       | Source     | Strain background* |
|----------|----------------------------------------------------------------|------------|--------------------|
| FF18733  | <i>MATa leu2-3, 112 trp1-289 ura3-52 lys1-1 his7-2</i>         | F. Fabre   |                    |
| FF18744  | <i>MATa srs2::LEU2</i>                                         | F. Fabre   |                    |
| FF18742  | <i>MATa rad52::URA3</i>                                        | F. Fabre   |                    |
| ECS2136  | <i>MATa rad52::URA3 srs2::NAT</i>                              | This study |                    |
| FF18964  | <i>MATa rad50::URA3</i>                                        | F. Fabre   |                    |
| FF18973  | <i>MATa rad54::LEU2</i>                                        | F. Fabre   |                    |
| FF181495 | <i>MATa sgs1::URA3</i>                                         | F. Fabre   |                    |
| ECS57    | <i>MATa rrm3::NATMX</i>                                        | This study |                    |
| ECS74    | <i>MATa mrc1::NATMX</i>                                        | This study |                    |
| ECS75    | <i>MATa ctf18::NATMX</i>                                       | This study |                    |
| ECS2928  | <i>MATa rad51::URA3 YCplac111-RAD52-6H-FFF</i>                 | This study |                    |
| ECS3159  | <i>MATa rad52::URA3 srs2::NAT YCplac111-RAD52-V95I-6H-FFF</i>  | This study |                    |
| ECS3161  | <i>MATa rad52::URA3 srs2::NAT YCplac111-RAD52-V129A-6H-FFF</i> | This study |                    |
| ECS3163  | <i>MATa rad52::URA3 srs2::NAT YCplac111-RAD52-D79N-6H-FFF</i>  | This study |                    |
| ECS3416  | <i>MATa rad52::URA3 srs2::NAT YCplac111-RAD52-V95D-6H-FFF</i>  | This study |                    |
| ECS3418  | <i>MATa rad52::URA3 srs2::NAT YCplac111-RAD52-V95F-6H-FFF</i>  | This study |                    |
| ECS3420  | <i>MATa rad52::URA3 srs2::NAT YCplac111-RAD52-V95T-6H-FFF</i>  | This study |                    |
| ECS2153  | <i>MATa rad52::URA3 srs2::NAT YCplac111</i>                    | This study |                    |
| ECS3031  | <i>MATa rad52::URA3 srs2::NAT YCplac111-RAD52-6H-FFF</i>       | This study |                    |
| ECS3138  | <i>MATa rad52::URA3 YCplac111-rad52-V95I-6H-FFF</i>            | This study |                    |
| ECS3140  | <i>MATa rad52::URA3 YCplac111-rad52-V129A-6H-FFF</i>           | This study |                    |
| ECS3142  | <i>MATa rad52::URA3 YCplac111-rad52-D79N-6H-FFF</i>            | This study |                    |
| ECS2958  | <i>MATa rad52::URA3 YCplac111-rad52-R37A-6H-FFF</i>            | This study |                    |
| ECS2917  | <i>MATa rad52::URA3 YCplac111</i>                              | This study |                    |
| ECS2947  | <i>MATa rad52::URA3 YCplac111-RAD52-6H-FFF</i>                 | This study |                    |

|          |                                                                                                                                  |                |
|----------|----------------------------------------------------------------------------------------------------------------------------------|----------------|
| ECS3410  | <i>MATa rad52::URA3 YCplac111-rad52-V95D-6H-FFF</i>                                                                              | This study     |
| ECS3412  | <i>MATa rad52::URA3 YCplac111-rad52-V95F-6H-FFF</i>                                                                              | This study     |
| ECS3414  | <i>MATa rad52::URA3 YCplac111-rad52-V95T-6H-FFF</i>                                                                              | This study     |
| ECS3284  | <i>MATa rad52::URA3 rad59-9MYC-KAN YCplac111-rad52-6H-FFF</i>                                                                    | This study     |
| ECS3286  | <i>MATa rad52::URA3 rad59-9MYC-KAN YCplac111-rad52-V95I-6H-FFF</i>                                                               | This study     |
| ECS3288  | <i>MATa rad52::URA3 rad59-9MYC-KAN YCplac111</i>                                                                                 | This study     |
| ECS2142  | <i>MATa Rad59::KANMX srs2 ::LEU2</i>                                                                                             | This study     |
| FF181770 | <i>MATa Rad59 ::KANMX</i>                                                                                                        | F. Fabre       |
| L317.4a  | <i>MATa arg4-RV</i>                                                                                                              | This study     |
| L318.1d  | <i>MATa arg4-Bg</i>                                                                                                              | This study     |
| L317.17c | <i>MATa arg4-RV srs2::LEU2</i>                                                                                                   | This study     |
| L318.7a  | <i>MATa arg4-Bg srs2::LEU2</i>                                                                                                   | This study     |
| ECS3230  | <i>MATa arg4-RV rad52-V95I</i>                                                                                                   | This study     |
| ECS3236  | <i>MATa arg4-Bg rad52-V95I</i>                                                                                                   | This study     |
| ECS3231  | <i>MATa arg4-RV rad52-V95I srs2::LEU2</i>                                                                                        | This study     |
| ECS3235  | <i>MATa arg4-Bg rad52-V95I srs2::LEU2</i>                                                                                        | This study     |
| ECS3239  | <i>MATa arg4-RV rad52-D79N</i>                                                                                                   | This study     |
| ECS3245  | <i>MATa arg4-Bg rad52- D79N</i>                                                                                                  | This study     |
| ECS3241  | <i>MATa arg4-RV rad52- D79N srs2::LEU2</i>                                                                                       | This study     |
| ECS3243  | <i>MATa arg4-Bg rad52- D79N srs2::LEU2</i>                                                                                       | This study     |
| EMY110   | <i>ade1-100 ura3-52 leu2-3,112 lys5 hml::ADE1 mat::hisG hmr::ADE1 leu2-cs his4::NAT-leu2Δ5' ade3::GAL::HO RAD52-6H-FFF-KANMX</i> | J. Haber YFP17 |
| ECS3220  | <i>srs2::HPH</i>                                                                                                                 | This study     |
| EMY424   | <i>rad52-D79N</i>                                                                                                                | This study     |
| EMY425   | <i>rad52- D79N srs2::HPH</i>                                                                                                     | This study     |
| EMY419   | <i>rad52-V95I</i>                                                                                                                | This study     |
| EMY420   | <i>rad52- V95I srs2::HPH</i>                                                                                                     | This study     |
| EMY430   | <i>rad52-V95I-6H-FFF</i>                                                                                                         | This study     |
| EMY441   | <i>rad52- V95I-6H-FFF srs2::HPH</i>                                                                                              | This study     |

|          |                                                                                    |            |               |
|----------|------------------------------------------------------------------------------------|------------|---------------|
| EMY443   | <i>rad52-R37A-6H-FFF</i>                                                           | This study |               |
| EMY444   | <i>rad52-R37A-6H-FFF srs2Δ</i>                                                     | This study |               |
| tGI354   | <i>hml::ADE1 MATalpha hmr::ADE1 arg5,6::MATa-inc::HPH1</i><br><i>ade3::GAL::HO</i> | J. Haber   | <i>JKM146</i> |
| ECS2632  | <i>srs2::NAT</i>                                                                   | This study |               |
| EMY421   | <i>rad52-V95I</i>                                                                  | This study |               |
| EMY422   | <i>rad52- V95I srs2::NAT</i>                                                       | This study |               |
| EMY427   | <i>rad52-D79N</i>                                                                  | This study |               |
| EMY428   | <i>rad52- D79N srs2::NAT</i>                                                       | This study |               |
| CTY10-5d | <i>MATa ade2 trp1-901 leu2-3,112 his3-200 gal4 gal80 - URA3::lexAop-lacZ</i>       | S. Fields  | CTY10-5d      |
| TLM285   | <i>Rad52::KANMX</i>                                                                | This study |               |

Strains are grouped according to their background, indicated on the first line of each group. Only differences from this genotype are noted subsequently.

\* When different from FF18733.

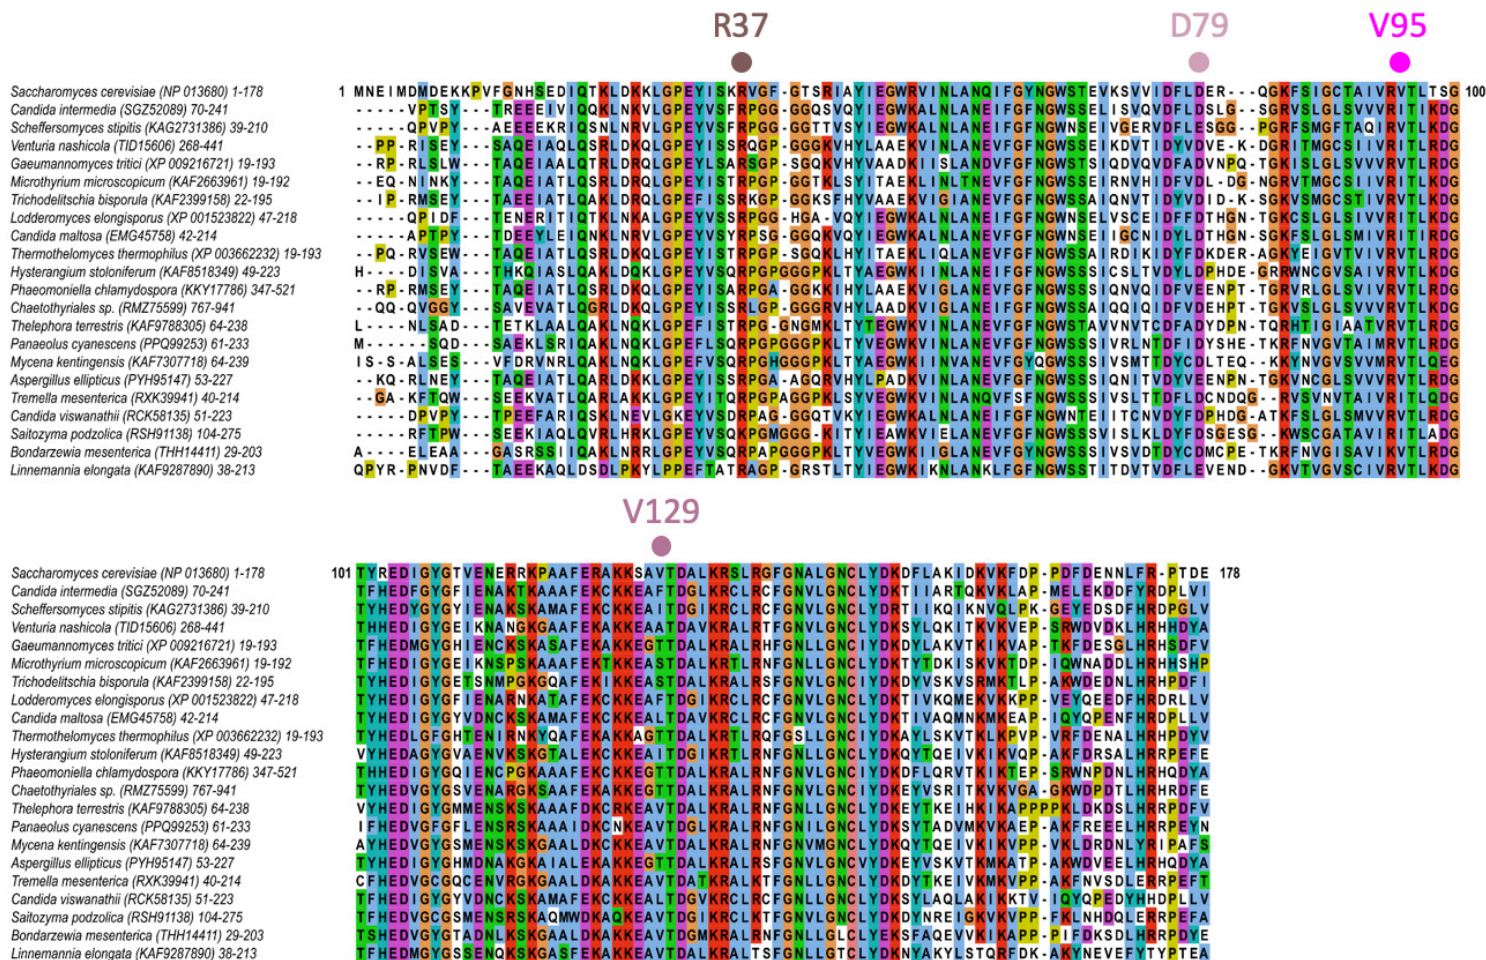

Figure S1. Multiple sequence alignment of a set of 22 representative homologs of *S. cerevisiae* Rad52 (shown on top) restricted to the N-terminal domain region (residues 1-178). The accession number of every homolog is indicated in brackets in the sequence description. The amino acid colors refer to the chemical character of the residues. On top of the alignment the positions of the mutated residues is indicated by a colored circle.

**Table S2. Rad52 mutations that suppress Srs2-deficient cells MMS sensitivity**

| Nucleotide change | Triplet Change | Amino acid change |
|-------------------|----------------|-------------------|
| G235A             | GAT->AAT       | D79N              |
| G283A             | GTT->ATT       | V95I              |
| T386C             | GTT->GCT       | V129A             |



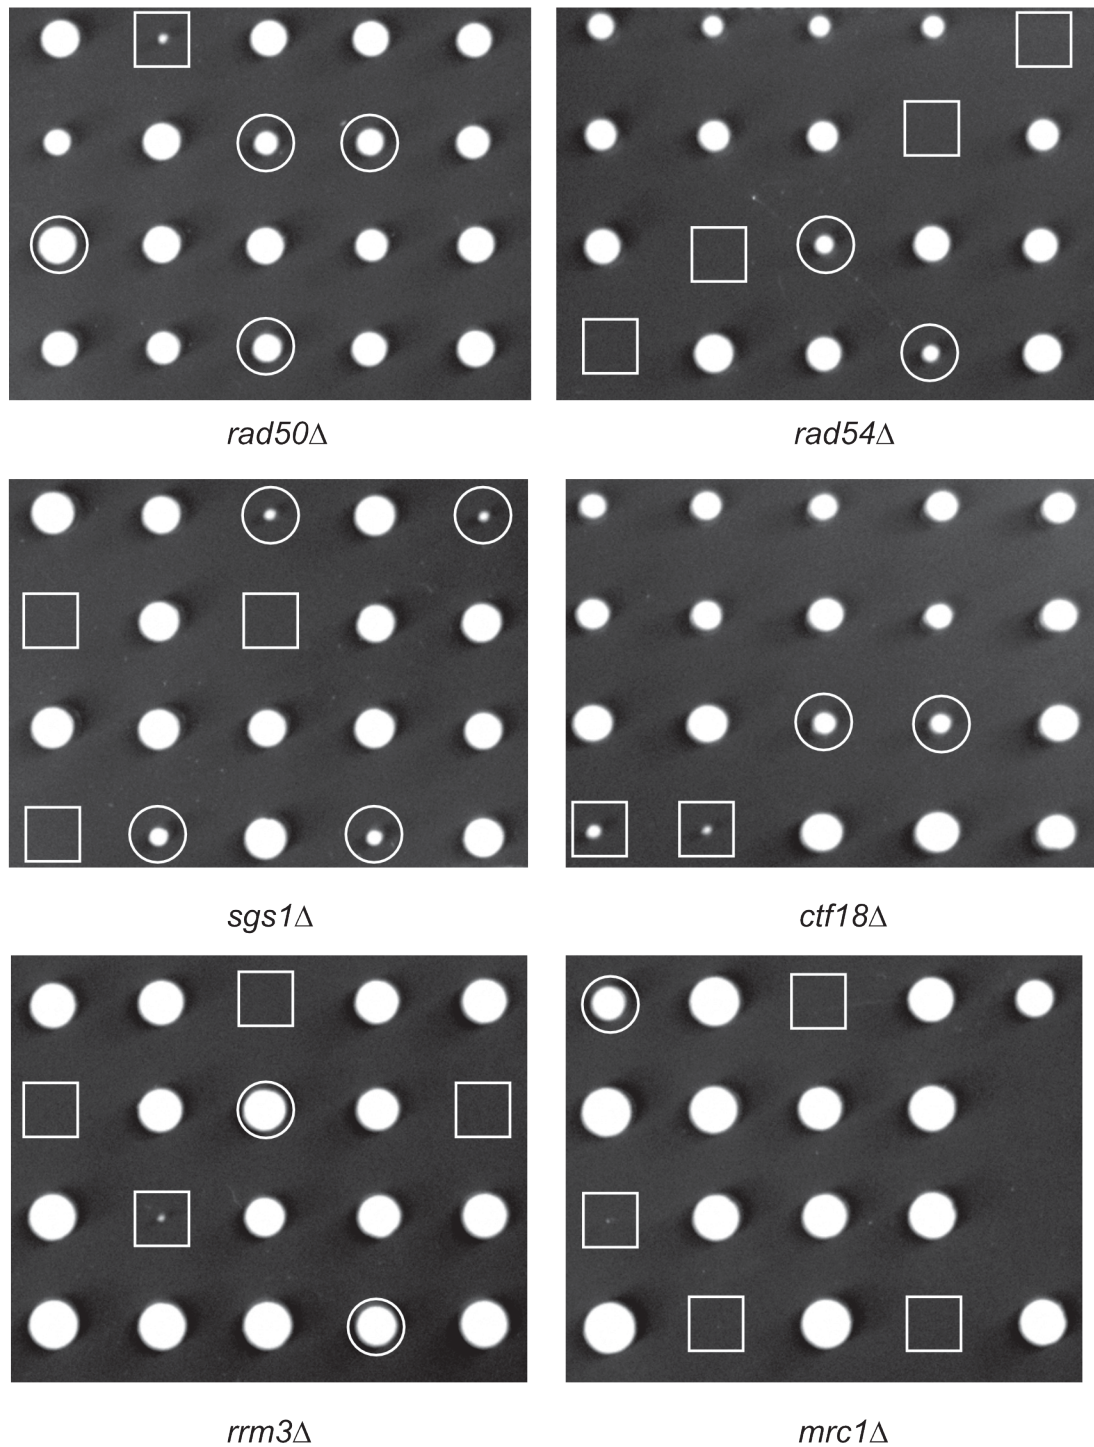

**Figure S2.** The *rad52-V95I* mutation suppresses the effect of mutations that are synthetically lethal with *srs2Δ*. Tetrad analysis of crosses between haploid *rad52-V95I srs2Δ* strains and haploid mutants that are synthetically lethal with *srs2Δ*. Double mutant spores, which do not contain *rad52-V95I*, are indicated by white squares. The white circles mark viable triple mutants.

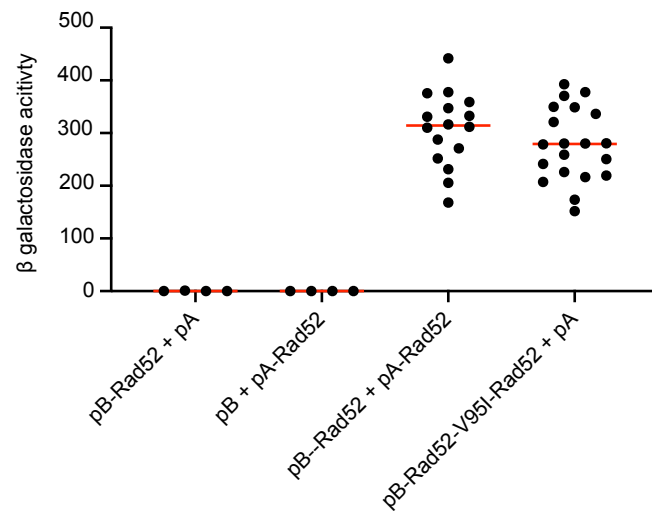

**Figure S3. Quantitative measurement of the impact of V95I on Rad52-self-interaction by Y2H analyses.** Experiments were done in *rad52Δ* cells to avoid the reduction of the Y2H signal by untagged Rad52. Median  $\beta$ -galactosidase activity is indicated (red line). Controls with empty vectors pBTM116 (pB) or pACT2 (pA) are also shown. The V95I mutation does not affect Rad52-self-interaction.

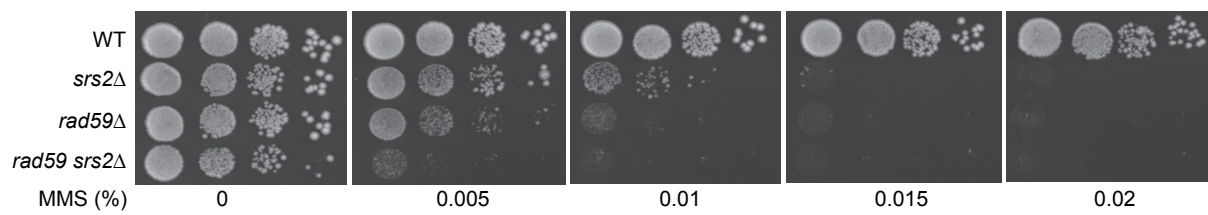

Figure S4. Serial 10-fold dilutions of haploid strains with the indicated genotypes were spotted onto rich media (YPD) containing different MMS concentrations.



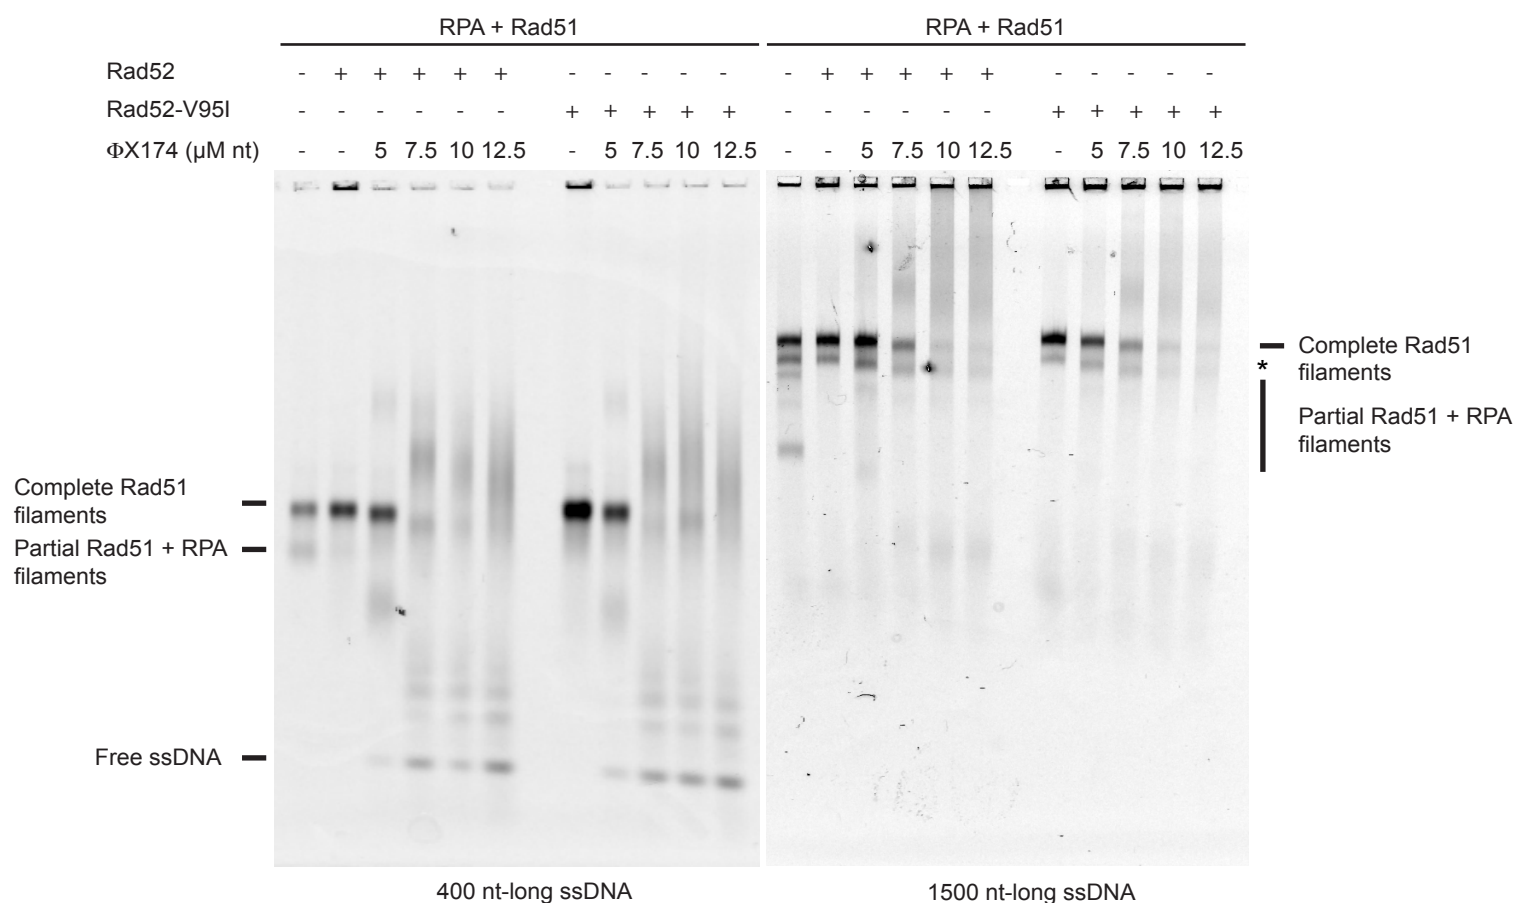

**Figure S5.** Rad51 filament stability challenged with excess of ssDNA. All experiments were performed with FLAG-tagged Rad52 proteins. The addition of Rad52 or Rad52-V95I together with Rad51 to RPA-coated 400-nt-long ssDNA or 1500-nt-long ssDNA strongly catalyzes the formation of complete Rad51 filaments. Addition of increasing amounts of competitor  $\Phi$ X174 ssDNA after Rad51 filament formation leads to their destabilization. Note the formation of an uncharacterized band with 1500-nt-long ssDNA (\*).
